# Supplementary material for: A database of phylogenetically atypical genes in archaeal and bacterial genomes, identified using the DarkHorse algorithm
Source: PubMed Central journal article supplement (PMC2573894; doi:10.1186/1471-2105-9-419), 2008-10-07
Supplement: 1471-2105-9-419-S1.pdf [file 1471-2105-9-419-S1.pdf]

## names

|             |
|-------------|
| id          |
| tax_id      |
| name_txt    |
| unique_name |
| name_class  |

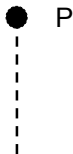

## precalc\_lineages

|              |
|--------------|
| species_name |
| tax_id       |
| lineage      |
| num_terms    |

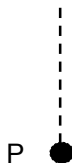

## nodes

|               |
|---------------|
| tax_id        |
| parent_tax_id |
| rank          |

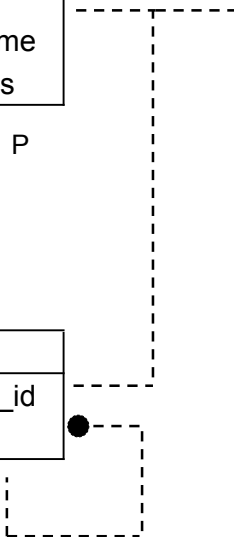

## db\_seq\_ids

|              |
|--------------|
| full_id      |
| gi_num       |
| alt_id       |
| tax_id       |
| alt_tax_id   |
| species_name |
| seq_length   |
| annotation   |
