# Supplementary material for: A database of phylogenetically atypical genes in archaeal and bacterial genomes, identified using the DarkHorse algorithm
Source: PubMed Central journal article supplement (PMC2573894; doi:10.1186/1471-2105-9-419), 2008-10-07
Supplement: 1471-2105-9-419-S2.pdf [file 1471-2105-9-419-S2.pdf]

### genome\_versions

| genome_vers_id |
|----------------|
| unix_name      |
| tax_id         |
| lineage        |
| source_id_list |
| num_proteins   |
| num_scaffolds  |
| completion     |
| source_db      |
| site_id        |
| rev_date       |
| minGC          |
| maxGC          |
| meanGC         |
| stdevGC        |

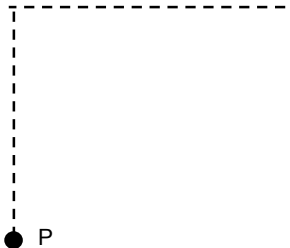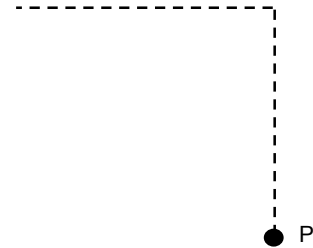

### searches

| search_id          |
|--------------------|
| genome_vers_id     |
| query_filename     |
| blast_tab_filename |
| min_coverage       |
| threshold          |
| num_matches        |
| raw_lpi_max        |
| search_date        |
| dh_version         |
| excl_keywords      |
| excl_level         |

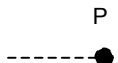

### matches

| match_num          |
|--------------------|
| search_id          |
| query_id           |
| bestmatch_id       |
| raw_lpi            |
| norm_lpi           |
| num_db_matches     |
| cand_set_size      |
| align_length       |
| pct_query_coverage |
| bitscore           |
| evaluate           |

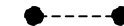

### queries

| query_id       |
|----------------|
| genome_vers_id |
| locus_tag      |
| refseq_id      |
| gi_num         |
| scaffold_id    |
| start          |
| stop           |
| strand         |
| annot          |
| pct_GC         |
| zscore_GC      |
